# Supplementary material
Source: Elsevier journal article supplement (https://www.sciencedirect.com/science/article/pii/S001425651300252X)
Supplement: mmc1 [file S001425651300252X:mmc1.docx]

**Respuesta correcta: d) Flegmasía cerúlea dolens.**

**Comentario:** La flegmasía cerúlea dolens (edema azulado doloroso) es una complicación poco común y potencialmente muy grave de la trombosis venosa profunda extensa. Tiene una mortalidad y tasa de amputación superiores al 50%. Hasta un 40% de los casos se asocia a una neoplasia maligna. Se produce por un aumento muy marcado de la presión venosa que impide un adecuado flujo de la microcirculación y favorece la trombosis de los capilares.
